# Supplementary material for: Development and validation of the OUTCoV score to predict the risk of hospitalisation among patients with SARS-CoV-2 infection in ambulatory settings: a prospective cohort study
Source: HighWire-hosted journal article supplement (doi:10.1136/bmjopen-2020-044242), 2021-06-01
Supplement: bmjopen-2020-044242supp001_data_supplement.pdf [file bmjopen-2020-044242supp001_data_supplement.pdf]

**Annex****Supplementary Table 1.** Performance of the OUTCoV score.

|                                    | OUTCOV<br>score | 95% CI        |
|------------------------------------|-----------------|---------------|
| Overall performance                |                 |               |
| Brier score                        | 0.0486          |               |
| Scaled Brier score (%)             | 18.36           |               |
| Discrimination                     |                 |               |
| C-statistic                        | 0.7932          | 0.7436-0.8429 |
| Mean predicted hospitalisation (%) |                 |               |
| If patient was hospitalized        | 12.3            | 10.2-14.3     |
| If patient was not hospitalised    | 5.1             | 4.8-5.4       |
| Discrimination slope (%)           | 7.2             | 5.7-8.6       |
| Calibration                        |                 |               |
| Observed hospitalisation (%)       | 5.48            | 4.31-6.65     |
| Predicted hospitalisation (%)      | 5.48            | 5.15-5.82     |
| Calibration-in-the-large (%)       | <0.1            |               |
| Ratio Predicted/Observed           | 1.00            | 0.79-1.21     |
| Calibration Intercept              | 0.0064          |               |
| Calibration slope                  | 0.88            | 0.71-1.06     |

**Sensitivity analyses**

As the questionnaire and symptoms included in plain text varied across time, we ran sensitivity analyses including the two last versions with all symptoms (versions 6 and 7, n=462). The associations between hospitalisation and symptoms were similar.

There was no loss to follow-up and no missing values except for symptom onset (n=62 missing values, coded as a separate category in the models) and Ct values (retrieved for n=589). Some participants did not live in the canton of Geneva and could have been hospitalised elsewhere. We ran the main analyses excluding participants who did not live in the canton of Geneva (n=1134). The results were similar to those reported in our study.

**Supplementary Table 2.** Associations between symptoms, age, comorbidities and hospitalisation, excluding non-residents (n=1134)

|                                                  | Descriptives | Hospitalization |             | Bivariate associations <sup>a</sup> |         |
|--------------------------------------------------|--------------|-----------------|-------------|-------------------------------------|---------|
| % (n)                                            | % (n)        | Yes, % (n)      | No, % (n)   | Odds ratio (95% CI)                 | p-value |
| Female                                           | 54.6 (619)   | 50.0 (39)       | 54.9 (580)  | Ref.                                | -       |
| Male                                             | 45.4 (515)   | 50.0 (39)       | 45.1 (476)  | 1.22 (0.77; 1.93)                   | .400    |
| <b>Symptoms</b>                                  |              |                 |             |                                     |         |
| Cough                                            | 72.8 (825)   | 71.2 (56)       | 72.8 (769)  | 10.95 (0.57; 1.58)                  | .844    |
| Muscle pain                                      | 57.9 (656)   | 64.1 (50)       | 57.4 (606)  | 1.33 (0.82; 2.14)                   | .248    |
| Fever                                            | 48.1 (545)   | 73.1 (57)       | 46.2 (488)  | 3.16 (1.89; 5.29)                   | <.001   |
| Runny nose                                       | 45.0 (510)   | 34.6 (27)       | 45.7 (483)  | 0.63 (0.39; 1.02)                   | .059    |
| Headache                                         | 44.2 (501)   | 43.6 (34)       | 44.2 (467)  | 0.98 (0.61; 1.55)                   | .913    |
| Chills                                           | 40.0 (454)   | 50.0 (39)       | 39.3 (415)  | 1.55 (0.97; 2.45)                   | .064    |
| Sore throat                                      | 32.4 (367)   | 23.1 (18)       | 33.1 (349)  | 0.61 (0.35; 1.05)                   | .072    |
| Loss of smell or taste (e.g. anosmia)            | 26.8 (304)   | 16.7 (13)       | 27.6 (291)  | 0.53 (0.29; 0.97)                   | .039    |
| Fatigue                                          | 23.6 (268)   | 18.0 (14)       | 24.1 (254)  | 0.69 (0.38; 1.26)                   | .223    |
| Abdominal complaints                             | 15.3 (174)   | 16.7 (13)       | 15.3 (161)  | 1.11 (0.60; 2.06)                   | .737    |
| Difficulty breathing (dyspnea)                   | 12.7 (144)   | 21.8 (17)       | 12.0 (127)  | 2.04 (1.16; 3.60)                   | .014    |
| Thoracic discomfort                              | 9.9 (112)    | 10.3 (8)        | 9.9 (104)   | 1.05 (0.49; 2.24)                   | .907    |
| No symptom                                       | 1.2 (13)     | 1.3 (1)         | 1.1 (12)    | 1.13 (0.15; 8.80)                   | .907    |
| Total no. of symptoms (mean, standard deviation) | 4.39 (2.02)  | 4.55 (2.11)     | 4.38 (2.02) | 1.04 (0.93; 1.17)                   | .460    |
| Early visit after symptom onset ( $\leq$ 3 days) | 52.6 (567)   | 48.5 (33)       | 51.5 (35)   | 0.84 (0.51; 1.37)                   | .488    |
| <b>Age and comorbidities</b>                     |              |                 |             |                                     |         |
| Age < 35 years                                   | 37.6 (426)   | 10.3 (8)        | 39.6 (418)  | Ref.                                | -       |
| Age 35-44                                        | 21.5 (244)   | 20.5 (16)       | 21.6 (228)  | 3.67 (1.55; 8.70)                   | .003    |
| Age 45-54                                        | 21.3 (242)   | 28.2 (22)       | 20.8 (220)  | 5.23 (2.29; 11.93)                  | <.001   |
| Age 55-64                                        | 14.2 (161)   | 25.6 (20)       | 13.4 (141)  | 7.41 (3.19; 17.20)                  | <.001   |
| Age $\geq$ 65 years                              | 5.4 (61)     | 15.4 (12)       | 4.6 (49)    | 12.80 (4.99; 32.83)                 | <.001   |
| Chronic respiratory disease                      | 9.7 (110)    | 19.2 (15)       | 9.0 (95)    | 2.41 (1.32; 4.39)                   | .004    |
| Hypertension                                     | 9.0 (102)    | 25.6 (20)       | 7.8 (82)    | 4.10 (2.35; 7.14)                   | <.001   |
| Diabetes                                         | 4.4 (50)     | 11.5 (9)        | 3.9 (41)    | 3.23 (1.51; 6.92)                   | .003    |
| Immunosuppression/cancer                         | 3.6 (41)     | 6.4 (5)         | 34 (36)     | 1.94 (0.74; 5.09)                   | .178    |
| Cardiovascular disease                           | 3.3 (37)     | 9.0 (7)         | 2.8 (30)    | 3.37 (1.43; 7.95)                   | .005    |

<sup>a</sup> Simple logistic regressions: outcome: hospitalisation.

**Supplementary Table 3.** Prediction model for the risk of hospitalisation among patients newly diagnosed with SARS-CoV-2 infection in ambulatory settings.

| Multivariable associations <sup>a</sup> |         |
|-----------------------------------------|---------|
| Odds ratio (95% CI)                     | p-value |

|                                             |                    |       |
|---------------------------------------------|--------------------|-------|
| Age (reference <35 years)                   |                    | <.001 |
| 35-44                                       | 3.58 (1.48; 8.67)  | .005  |
| 45-54                                       | 4.96 (2.12; 11.61) | <.001 |
| 55-64                                       | 6.53 (2.70; 15.77) | <.001 |
| 65+                                         | 8.17 (2.92; 22.89) | <.001 |
| Dyspnea (reference none)                    | 2.79 (1.52; 5.13)  | .001  |
| Fever (reference none)                      | 3.46 (2.01; 5.96)  | <.001 |
| Hypertension (reference no)                 | 2.79 (1.48; 5.25)  | .001  |
| Chronic respiratory diseases (reference no) | 2.35 (1.23; 4.47)  | .009  |

<sup>a</sup> Logistic regression.
